# Supplementary material
Source: PubMed Central journal article supplement (PMC4625837)

**A**

| GM969 shXPA vs. scrambled                            | XPA deficient vs. XPA complemented                   |
|------------------------------------------------------|------------------------------------------------------|
| GO0046870 CADMIUM ION BINDING                        | GO0000786 NUCLEOSOME                                 |
| GO0003735 STRUCTURAL CONSTITUENT OF RIBOSOME         | GO0006334 NUCLEOSOME ASSEMBLY                        |
| GO0005840 RIBOSOME                                   | GO0007001 CHROMOSOME ORGANIZATION AND BIOGENESIS (   |
| GO0030529 RIBONUCLEOPROTEIN COMPLEX                  | * GO0005743 MITOCHONDRIAL INNER MEMBRANE             |
| GO0006334 NUCLEOSOME ASSEMBLY                        | * GO0008137 NADH DEHYDROGENASE (UBIQUINONE) ACTIVITY |
| GO0007001 CHROMOSOME ORGANIZATION AND BIOGENESIS (   | GO0005694 CHROMOSOME                                 |
| GO0005694 CHROMOSOME                                 | * GO0005739 MITOCHONDRION                            |
| GO0015935 SMALL RIBOSOMAL SUBUNIT                    | GO0046870 CADMIUM ION BINDING                        |
| GO0000786 NUCLEOSOME                                 | GO0005507 COPPER ION BINDING                         |
| GO0005507 COPPER ION BINDING                         | * GO0004129 CYTOCHROME C OXIDASE ACTIVITY            |
| * GO0005743 MITOCHONDRIAL INNER MEMBRANE             | * GO0005746 MITOCHONDRIAL RESPIRATORY CHAIN          |
| * GO0005739 MITOCHONDRION                            | * GO0006120 MITOCHONDRIAL ELECTRON TRANSPORT NADH T  |
| * GO0005746 MITOCHONDRIAL RESPIRATORY CHAIN          | GO0005840 RIBOSOME                                   |
| * GO0006120 MITOCHONDRIAL ELECTRON TRANSPORT NADH T  | GO0030529 RIBONUCLEOPROTEIN COMPLEX                  |
| * GO0004129 CYTOCHROME C OXIDASE ACTIVITY            | GO0003735 STRUCTURAL CONSTITUENT OF RIBOSOME         |
| * GO0008137 NADH DEHYDROGENASE (UBIQUINONE) ACTIVITY | GO0015935 SMALL RIBOSOMAL SUBUNIT                    |
| GO0051028 MRNA TRANSPORT                             | GO0006810 TRANSPORT                                  |
| GO0004672 PROTEIN KINASE ACTIVITY                    | GO0007264 SMALL GTPASE MEDIATED SIGNAL TRANSDUCTIO   |
| GO0005575 CELLULAR COMPONENT                         | GO0005575 CELLULAR COMPONENT                         |
| GO0006468 PROTEIN AMINO ACID PHOSPHORYLATION         | GO0051028 MRNA TRANSPORT                             |
| GO0015031 PROTEIN TRANSPORT                          | GO0005515 PROTEIN BINDING                            |
| GO0000166 NUCLEOTIDE BINDING                         | GO0004672 PROTEIN KINASE ACTIVITY                    |
| GO0006810 TRANSPORT                                  | GO0015031 PROTEIN TRANSPORT                          |
| GO0007264 SMALL GTPASE MEDIATED SIGNAL TRANSDUCTIO   | GO0006468 PROTEIN AMINO ACID PHOSPHORYLATION         |
| GO0005515 PROTEIN BINDING                            | GO0000166 NUCLEOTIDE BINDING                         |

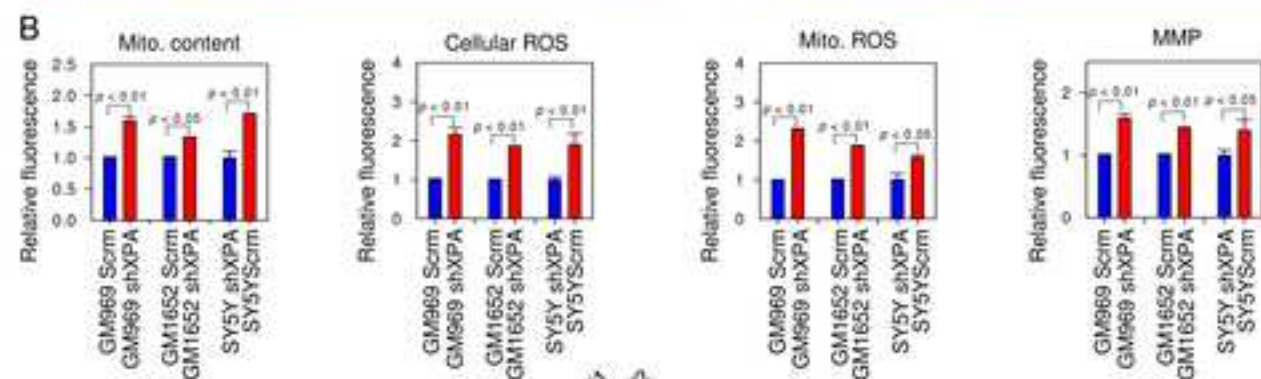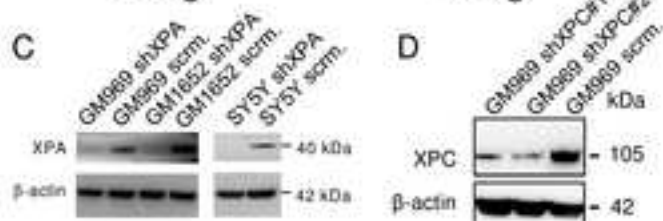

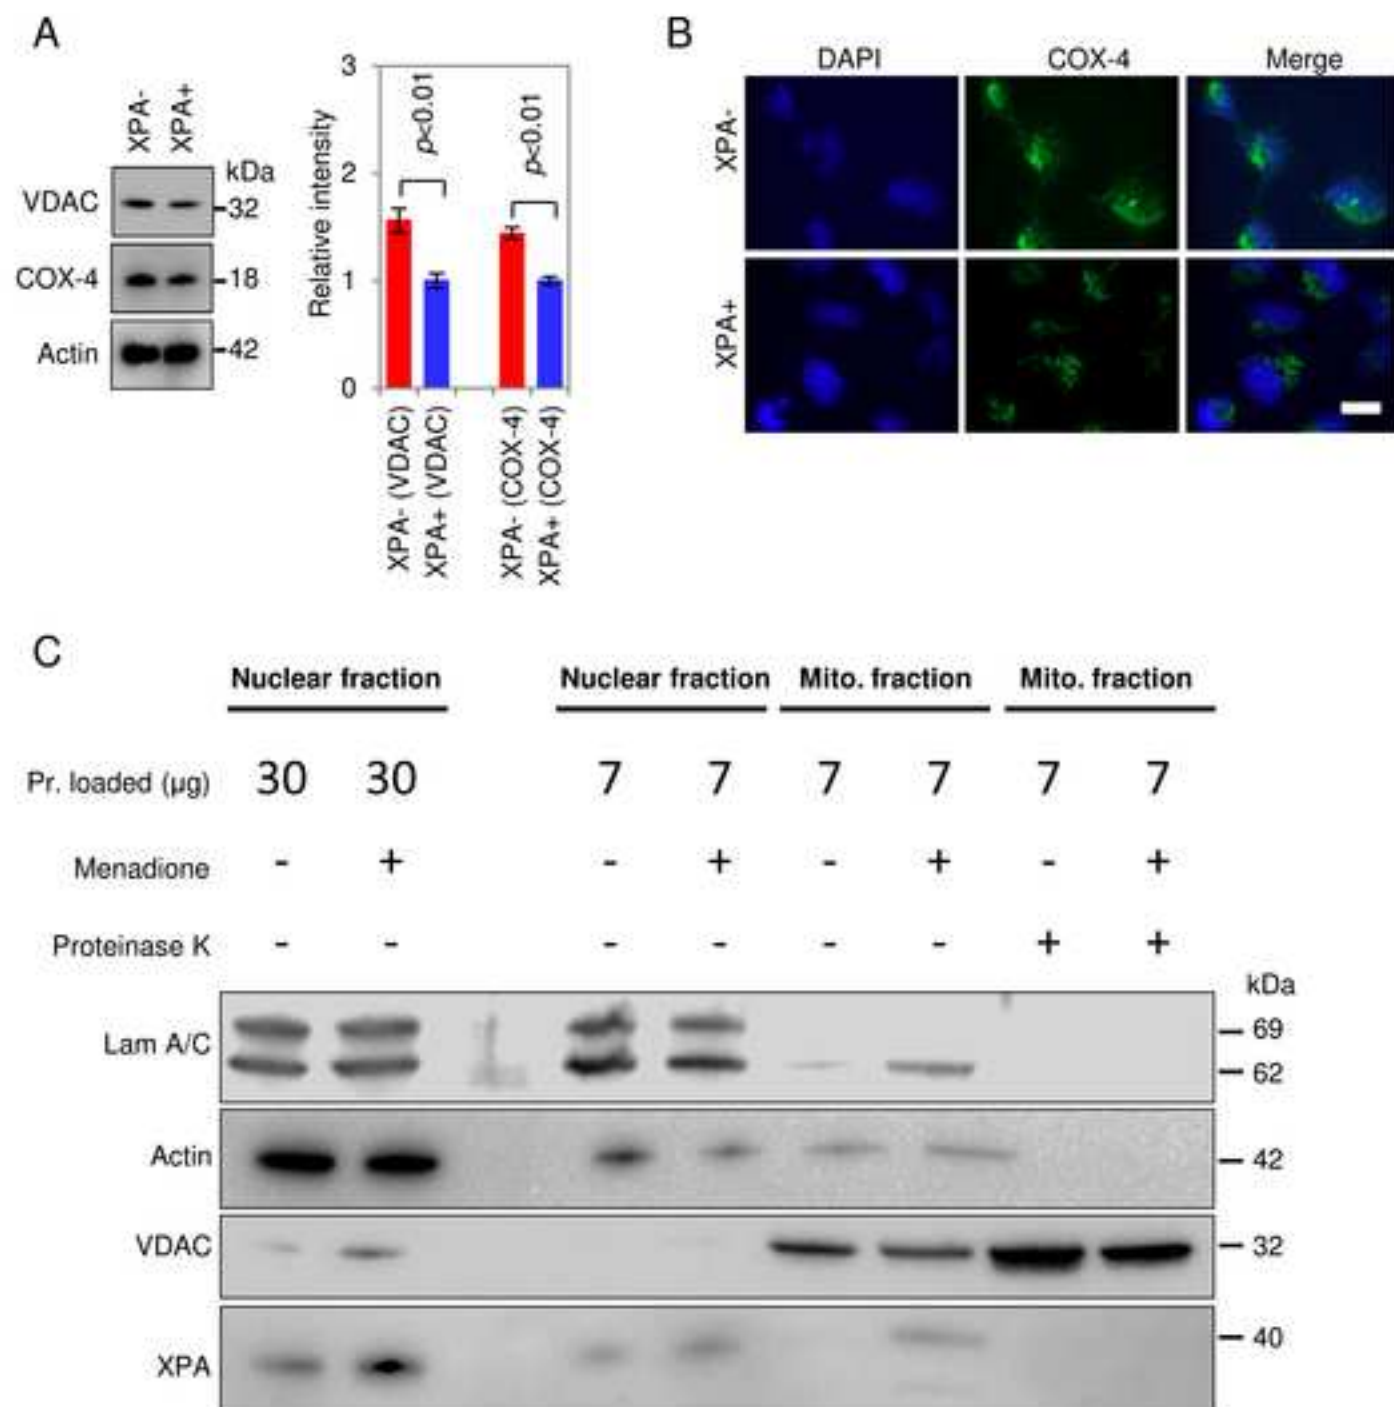

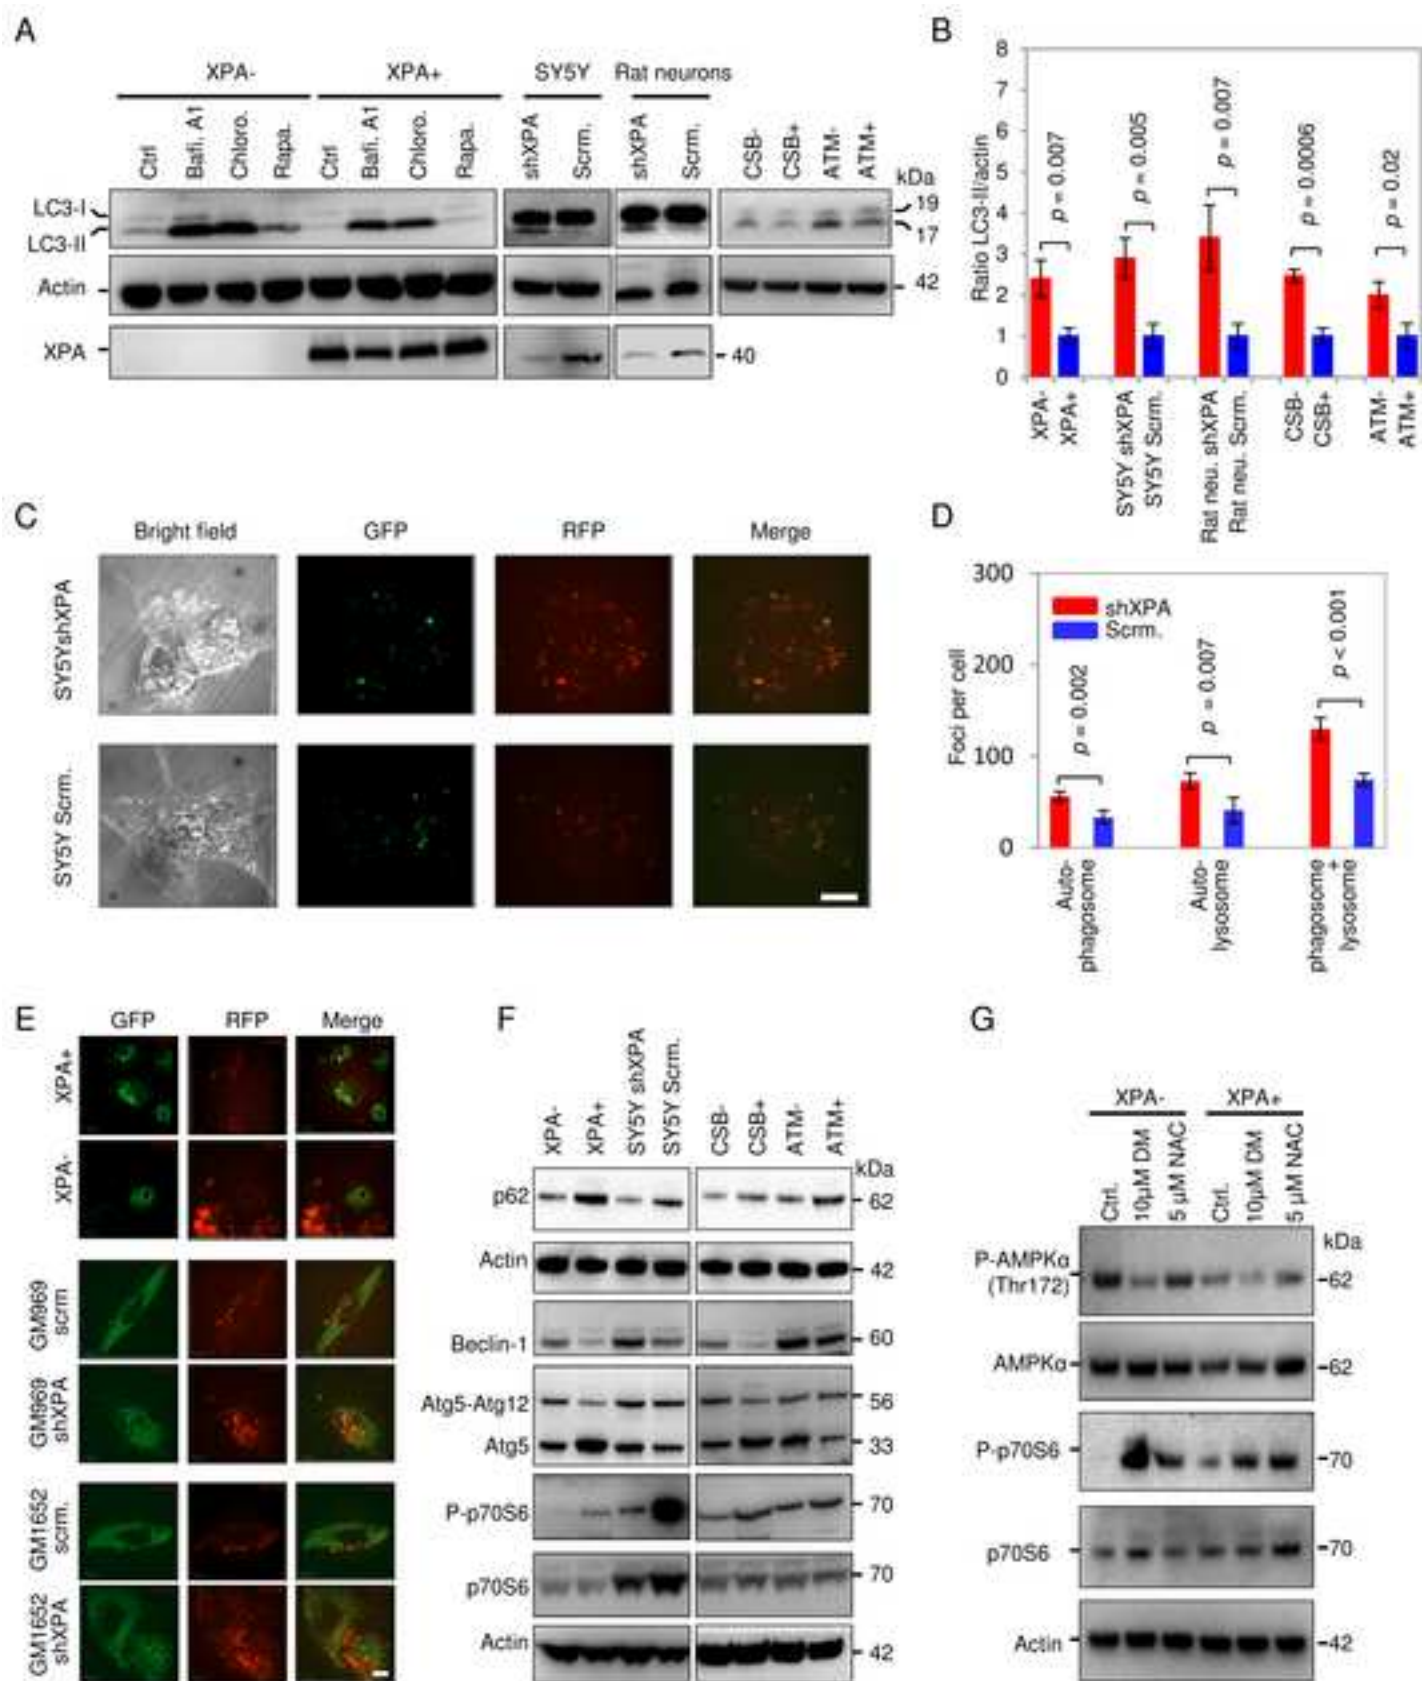



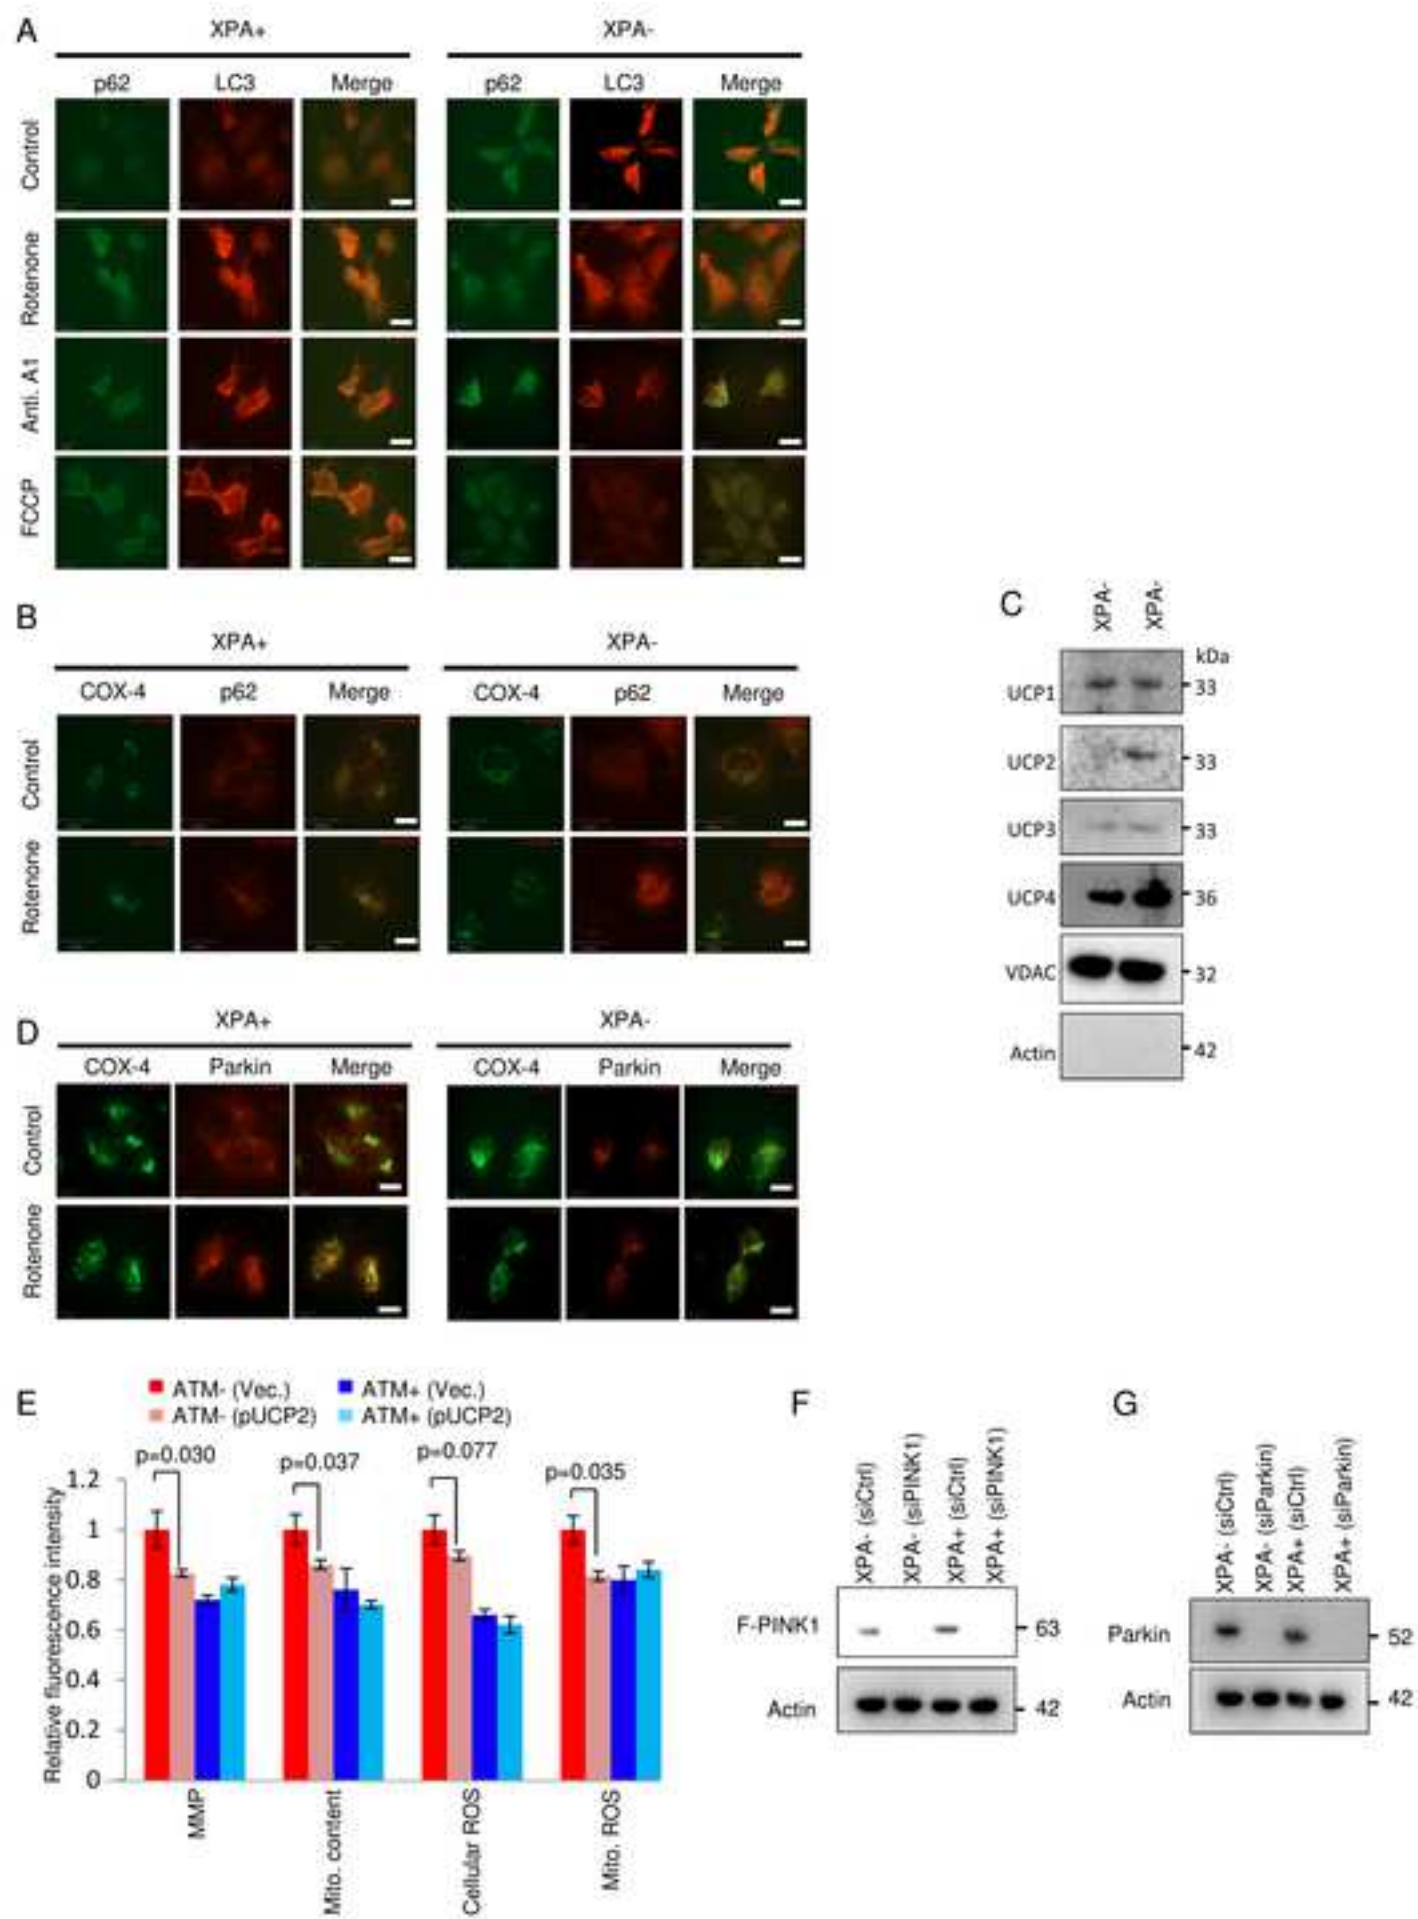

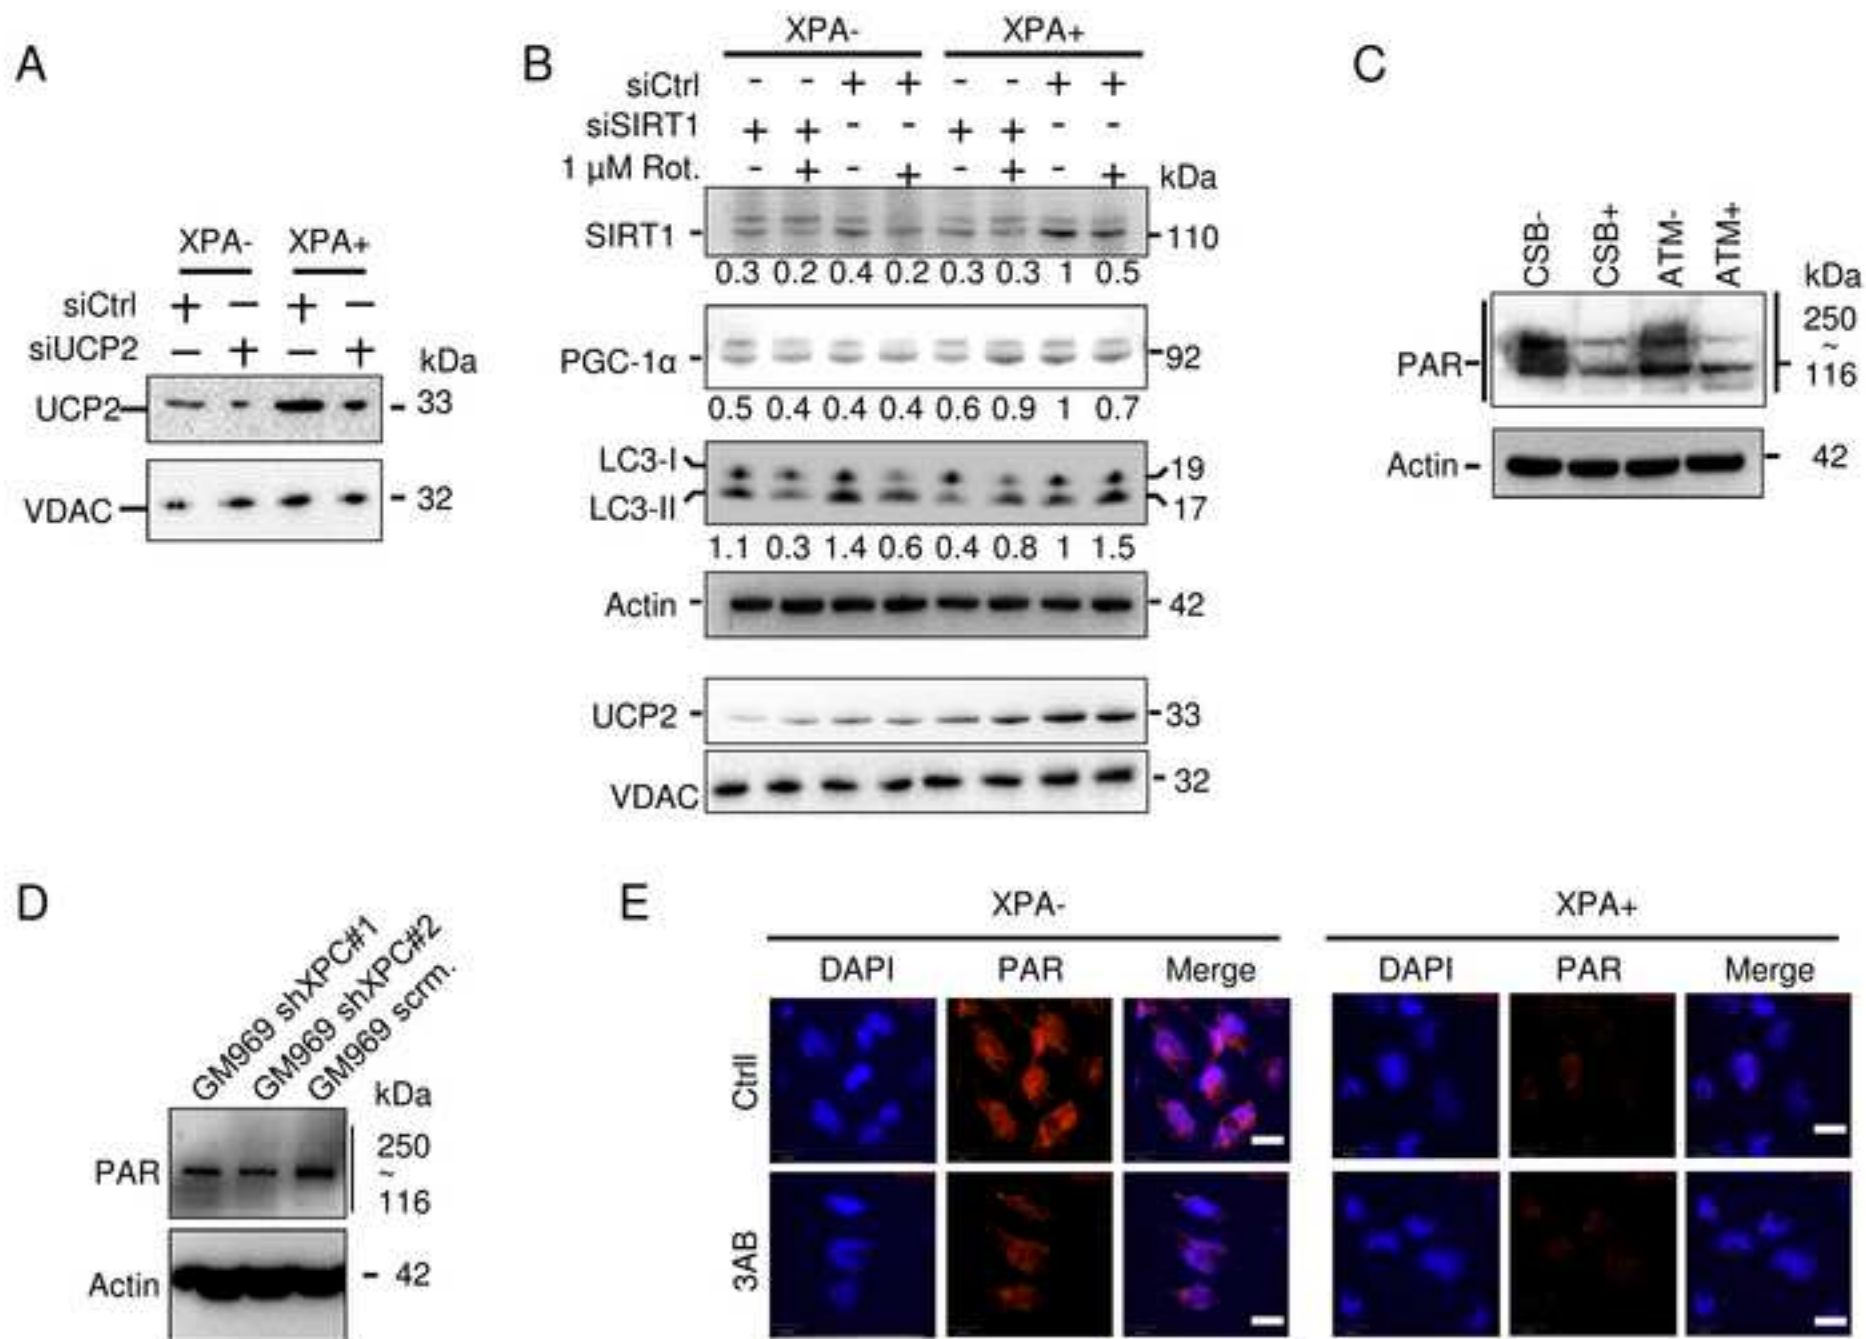

Supplement: NIHMS580871-supplement-02.pdf [file NIHMS580871-supplement-02.pdf]
